## MODULATORY EFFECTS OF 5-HYDROXYTRYPTAMINE ON VOLTAGE-ACTIVATED CURRENTS IN CULTURED ANTENNAL LOBE NEURONES OF THE SPHINX MOTH *MANDUCA SEXTA*

ALISON R. MERCER<sup>1,2</sup>, JON H. HAYASHI<sup>1,\*</sup> AND JOHN G. HILDEBRAND<sup>1,†</sup>

<sup>1</sup>Arizona Research Laboratories, Division of Neurobiology, University of Arizona, Tucson, AZ 85721, USA and  
<sup>2</sup>Centre for Neuroscience and Department of Zoology, University of Otago, PO Box 56, Dunedin, New Zealand

Accepted 28 October 1994

### Summary

The modulatory effects of 5-hydroxytryptamine (5-HT or serotonin) on voltage-gated currents in central olfactory neurones of the moth *Manduca sexta* have been examined *in vitro* using whole-cell patch-clamp recording techniques. Central olfactory neurones were dissociated from the antennal lobes of animals at stage 5 of the 18 stages of metamorphic adult development. The modulatory actions of 5-HT on voltage-activated ionic currents were examined in a subset of morphologically identifiable antennal lobe neurones maintained for 2 weeks in primary cell culture.

5-HT caused reversible reduction of both a rapidly activating A-type K<sup>+</sup> current and a relatively slowly activating K<sup>+</sup> current resembling a delayed rectifier-type conductance. 5-HT also reduced the magnitude of voltage-activated Ca<sup>2+</sup> influx in these cells. The functional significance of 5-HT-modulation of central neurones is discussed.

Key words: 5-hydroxytryptamine, serotonin, *Manduca sexta*, neuromodulation, antennal lobe, olfaction, cell culture.

### Introduction

The first central olfactory processing station of the insect brain, the antennal lobe (AL), bears a striking morphological resemblance to the analogous structure in the vertebrate brain, the olfactory bulb. Both the AL and the olfactory bulb exhibit a central region of coarse neurites that is surrounded by spheroidal regions of densely packed synaptic neuropile called glomeruli. In each system, the glomeruli contain the terminal arborizations of primary afferent axons, processes of local interneurones, neurites of projection (output) neurones and ramifications of centrifugal neurones from other regions of the brain (see Homberg *et al.* 1989; Shepherd *et al.* 1987). Furthermore, both the AL and the olfactory bulb receive efferent centrifugal input from neurones that contain the biogenic monoamine 5-hydroxytryptamine (5-HT or serotonin; Halász and Shepherd, 1983; Kent *et al.* 1987; Soghomonian *et al.* 1988; Homberg *et al.* 1989; Salecker and Distler, 1990; Sun *et al.* 1992, 1993). In neither system, however, is the functional significance of 5-HT well understood. We have examined the modulatory effects of 5-HT on central olfactory neurones of the sphinx moth, *Manduca sexta*, using AL neurones in primary cell culture as an experimentally tractable system for investigations of the mechanisms of action of 5-HT.

The organization, development and neurochemistry of the

ALs have been examined in considerable detail in *M. sexta* (e.g. Sanes and Hildebrand, 1976*a,b*; Tolbert and Hildebrand, 1981; Schneiderman *et al.* 1982; Tolbert *et al.* 1983; Hildebrand, 1985; Hoskins *et al.* 1986; Kent *et al.* 1987; Homberg and Hildebrand, 1989; Homberg *et al.* 1988, 1989), and single-unit recording and staining of central olfactory neurones have been used extensively to study the processing of olfactory information in the brain of this species (e.g. Matsumoto and Hildebrand, 1981; Christensen and Hildebrand, 1987*a,b*; Kanzaki *et al.* 1989, 1991*a,b*; Hansson *et al.* 1991).

Each of the two ALs in the brain of the moth receives input from a single 5-HT-immunoreactive neurone (5-HT-IRN), the cell body of which is located in the contralateral AL (Kent *et al.* 1987; Homberg *et al.* 1989). In the brain of the adult moth, each 5-HT-IRN projects to most, if not all, glomeruli of the AL it innervates. Synaptic contacts between the 5-HT-IRN and other neurones in the glomerular neuropile of the AL are predominantly output synapses from the 5-HT-IRN (Sun *et al.* 1992, 1993). Although the identities of cells postsynaptic to the 5-HT-IRN have yet to be determined, intracellular studies have shown that the responses of some AL neurones to primary afferent synaptic input can be modulated by 5-HT. When

\*Present address: American Cyanamid, Insect Discovery/Neurobiology, PO Box 400, Princeton, NJ 08543, USA.

†Author for correspondence.

applied at  $10^{-4}$  mol l<sup>-1</sup>, 5-HT increases cell excitability, leads to a broadening of action potentials in some neurones and increases cell input resistance (Kloppenborg and Hildebrand, 1992, 1995).

The 5-HT-IRN associated with each AL can be identified as early as the first larval instar (Kent *et al.* 1987). The close association of these neurones with the ALs throughout metamorphic adult development is consistent with the possibility that 5-HT contributes to the developmental regulation of central olfactory neurones in the moth. In the present investigation, we have taken advantage of procedures recently developed for long-term maintenance of *M. sexta* central olfactory neurones in primary cell culture (Hayashi and Hildebrand, 1990) to explore the modulatory actions of 5-HT on AL neurones from animals early (stage 5) in metamorphic adult development. We have used whole-cell patch-clamp recording techniques to examine *in vitro* the effects of 5-HT on voltage-activated membrane currents in a morphologically identifiable subset of AL neurones that show highly consistent responses to 5-HT. These neurones have been referred to elsewhere as RR neurones (Oland *et al.* 1992; Oland and Hayashi, 1993). 5-HT exerts multiple effects on these cells, the possible functional significance of which is discussed.

A preliminary report of some of this work has appeared elsewhere (Mercer *et al.* 1992).

## Materials and methods

### *Insects*

*Manduca sexta* (Lepidoptera: Sphingidae) were reared on an artificial diet (modified from that of Bell and Joachim, 1976) and maintained at 25 °C under a long-day photoperiod regimen (17 h:7 h light:dark) and 50–60% relative humidity. *M. sexta* larvae hatch from eggs and pass through five instars prior to pupation. Metamorphic adult development proceeds through 18 stages, each of which is accompanied by well-defined changes in pupal morphology (Sanes and Hildebrand, 1976a,b; Tolbert *et al.* 1983). Moths at stage 5 of metamorphic adult development were examined in this study.

### *Preparation of cultures*

Techniques used to culture *M. sexta* AL neurones have been described previously (Hayashi and Hildebrand, 1990). Brains were removed from cold-anaesthetized pupae and placed into sterile culture saline containing (in mmol l<sup>-1</sup>) 149.9 NaCl, 3 KCl, 3 CaCl<sub>2</sub>, 0.5 MgCl<sub>2</sub>, 10 Tes and 11 D-glucose, as well as 6.5 g l<sup>-1</sup> lactalbumin hydrolysate, 5 g l<sup>-1</sup> TC yeastolate (Difco), 10% foetal bovine serum (FBS), 100 i.u. ml<sup>-1</sup> penicillin and 100 µg ml<sup>-1</sup> streptomycin, adjusted to pH 7 and 360 mosmol l<sup>-1</sup>. ALs were transferred into Hanks' Ca<sup>2+</sup>- and Mg<sup>2+</sup>-free buffered salt solution containing 0.5 mg ml<sup>-1</sup> collagenase and 2 mg ml<sup>-1</sup> Dispase for 2 min at 37 °C to dissociate the tissue, which was then dispersed by trituration with a fire-polished Pasteur pipette. Enzyme treatment was terminated by centrifuging cells, first through 6 ml of culture saline and then through the same volume of culture medium

(composition below). Dissociated cells were allowed to settle and to adhere to the surface of culture dishes coated with Concanavalin A (200 µg ml<sup>-1</sup>) and laminin (2 µg ml<sup>-1</sup>). Cultures were placed in a humidified incubator at 26 °C. The culture medium was replaced every 3–4 days, and cells were maintained *in vitro* for 2–3 weeks.

### *Culture medium*

The following additions were made to 500 ml of Leibovitz's L15 medium (Gibco): 10% FBS, 185 mg of α-ketoglutaric acid, 200 mg of fructose, 350 mg of glucose, 335 mg of malic acid, 30 mg of succinic acid, 1.4 g of TC yeastolate, 1.4 g of lactalbumin hydrolysate, 0.01 mg of niacin, 30 mg of imidazole, 100 µg ml<sup>-1</sup> streptomycin, 100 i.u. ml<sup>-1</sup> penicillin, 1 µg ml<sup>-1</sup> 20-hydroxyecdysone (Sigma) and 2.5 ml of stable vitamin mix. A 5 ml stock solution of vitamin mix consists of: 15 mg of aspartic acid, 15 mg of cystine, 5 mg of β-alanine, 0.02 mg of biotin, 2 mg of vitamin B12, 10 mg of inositol, 10 mg of choline chloride, 0.05 mg of lipoic acid, 5 mg of *p*-aminobenzoic acid, 25 mg of fumaric acid, 0.4 mg of coenzyme A, 15 mg of glutamic acid and 0.5 mg of Phenol Red. The medium was adjusted to pH 7 and 350 mosmol l<sup>-1</sup> and filter-sterilized prior to use.

### *Identification of cells in culture*

After 7–10 days, AL neurones in culture can be identified on the basis of their morphology and whole-cell current profile (Hayashi and Hildebrand, 1990; Hayashi *et al.* 1992; Oland *et al.* 1992; Oland and Hayashi, 1993). In the present investigation, cells were maintained for 12–14 days in culture prior to use. Modulatory effects of 5-HT were examined in detail in a subset of AL neurones referred to elsewhere as RR neurones (Oland *et al.* 1992; Oland and Hayashi, 1993). Although the specific identity of these neurones has yet to be established, several lines of evidence suggest that RR neurones are more likely to be local interneurones than projection (output) neurones of the AL (Oland and Hayashi, 1993). The effects of 5-HT on these cells are highly consistent and reversible (Mercer *et al.* 1992).

### *Biophysical measurements*

Membrane currents from AL neurones grown in culture for 12–14 days were recorded using the whole-cell configuration of the patch-clamp technique (Hamill *et al.* 1981; Fenwick *et al.* 1982). Electrodes with resistances of 2–4 MΩ were made from borosilicate glass using a Narishige PP-83 electrode puller and were filled with a solution containing 150 mmol l<sup>-1</sup> potassium aspartate, 10 mmol l<sup>-1</sup> NaCl, 2 mmol l<sup>-1</sup> MgCl<sub>2</sub>, 1 mmol l<sup>-1</sup> CaCl<sub>2</sub>, 11 mmol l<sup>-1</sup> EGTA and 2 mmol l<sup>-1</sup> ATP, and adjusted to pH 7 with Hepes (5 mmol l<sup>-1</sup>) and to 330 mosmol l<sup>-1</sup> with mannitol. Cells were visualized using an inverted microscope equipped with Hoffman modulation contrast optics to aid placement of the electrode on the cell soma. To facilitate the formation of high-resistance (gigaohm) seals, culture medium was replaced with insect saline solution (100 mmol l<sup>-1</sup> NaCl, 4 mmol l<sup>-1</sup> KCl, 6 mmol l<sup>-1</sup> CaCl<sub>2</sub>,

5 mmol<sup>-1</sup> D-glucose, 10 mmol<sup>-1</sup> HEPES, pH 7), adjusted to 360 mosmol<sup>-1</sup> with mannitol prior to recording. Cells were continuously superfused with fresh saline solution throughout the recording period. For whole-cell recording, light suction and brief high-voltage pulses were used to rupture the cell membrane beneath the recording electrode. Membrane currents were recorded using an Axopatch 1B amplifier (Axon Instruments, Foster City, CA). Data were acquired and analyzed with the aid of pClamp software (Axon Instruments) run on an i30386 microcomputer. Cells were clamped at a holding potential of -70 mV, and depolarizing voltage steps were used to activate voltage-gated channels in the cells. Membrane currents were filtered with a 10 kHz low-pass four-pole Bessel filter and sampled at intervals of 100  $\mu$ s. Junction potentials were nullified prior to seal formation, and linear leakage currents were subtracted electronically from all records. Because no compensation was made for series resistance, voltage errors may be present where currents measured were large. The currents recorded in these cells seldom exceeded 2 nA, and the series resistance (calculated from the capacitive charging transient) was always less than 5 M $\Omega$ , suggesting a maximum voltage error of 10 mV. Series-resistance errors should not affect the central conclusions of this study.

Components of the whole-cell current recorded in AL neurones were isolated using routine pharmacological techniques. Sodium currents in *M. sexta* neurones can be blocked with tetrodotoxin (TTX, 0.01  $\mu$ mol<sup>-1</sup>) and calcium currents with 500  $\mu$ mol<sup>-1</sup> CdCl<sub>2</sub> (Hayashi *et al.* 1992; Hayashi and Levine, 1992). A-type K<sup>+</sup> currents (Connor and Stevens, 1971) were blocked with 4-aminopyridine (4-AP, 5 mmol<sup>-1</sup>; see Rudy, 1988) or by replacing potassium aspartate in the electrode with CsCl (see Armstrong and Bezanilla, 1973). Tetraethylammonium chloride (TEA<sup>+</sup>, 30 mmol<sup>-1</sup>) was used to block non-A-type K<sup>+</sup> currents. Stable recordings from 3–5 neurones were obtained for each experimental protocol. The results presented in this paper are based on recordings from a total of 53 AL neurones.

#### 5-HT application

Whole-cell current profiles recorded prior to placement of the 5-HT-containing pipette near the cell soma were compared with currents elicited during the application of 5-HT (as 5-HT creatinine sulphate; Sigma) and at several time points thereafter. 5-HT (10, 50, 100 or 500  $\mu$ mol<sup>-1</sup>) was pressure-ejected across the cell body in a pulse beginning 5 ms prior to the onset of each voltage step. Unless otherwise indicated, 5-HT was applied for 30 ms. A visible dye (Neutral Red) added to the 5-HT solution was used in a set of preliminary experiments to establish the optimal placement of the 5-HT delivery pipette (tip diameter approximately 4  $\mu$ m) and a suitable ejection pressure (approximately 2  $\times$  10<sup>4</sup> Pa). Increasing the length of the 5-HT pulse did not alter the nature of the effects observed but did affect their magnitude. The dose-dependence of the effects of 5-HT was confirmed by application of two different concentrations of

5-HT to the same cell from puffer pipettes positioned equidistant from the cell body. Brief pulses of 5-HT were used in these experiments to ensure that full recovery from the effects of 5-HT would be observed during the recording session, so that the reproducibility of the effects could also be tested. If long pulses (200–500 ms or greater) of 5-HT were applied to the cells, prolonged washing ( $\geq$  20 min) in 5-HT-free saline was required for complete reversal of some of the effects of 5-HT.

#### Statistical analysis

Within-group and between-group comparisons were made using *t*-tests for correlated or independent means, respectively. Data are expressed as means  $\pm$  S.E.M.

### Results

Whole-cell current profiles of several of the morphologically distinct types of cultured AL neurones described previously (Hayashi and Hildebrand, 1990; Hayashi *et al.* 1992; Oland *et al.* 1992; Oland and Hayashi, 1993), including proximal-branching cells (Fig. 1A), symmetrical cells (Fig. 1B), RR cells (Fig. 1C) and radial cells (Fig. 1D), were reversibly altered by pulse application of 5-HT. In each of these cell types, 5-HT reduced the magnitude of outward current in a manner similar to that shown in Fig. 2. Several unidentified subtypes of neurones did not respond to pulse application of 5-HT.

Modulatory actions of 5-HT were examined in detail in the subset of AL neurones known as RR cells (Fig. 1C). *In vitro*, these cells possess a large and irregularly shaped cell body and neurites that have a characteristic zigzag appearance (Oland and Hayashi, 1993). Whole-cell current profiles in RR neurones taken from animals at stage 5 in their metamorphic adult development were dominated by large outward currents (Fig. 2A). Typically, 5-HT reduced the magnitude of whole-cell current in these cells (Fig. 2B), an effect that reversed as 5-HT was washed away by superfusion with normal saline solution (Fig. 2C). Changing the length of the 5-HT pulse from 5 to 55 ms altered the magnitude of 5-HT-induced effects (Fig. 2D). To determine whether this could be related to changes in the final concentration of 5-HT arriving at the cell surface, different concentrations of 5-HT were applied to the same cell from two independent puffer pipettes. The pipettes had similar tip diameters (approximately 4  $\mu$ m) and were positioned equidistant from the cell body. Identical pressure pulses were applied to each pipette. Subtracting current profiles recorded in the presence of 5-HT (Fig. 2B) from those observed prior to 5-HT application (Fig. 2A) provides an indication of current blocked by 5-HT (Fig. 2E). Different concentrations of 5-HT applied to the same cell confirmed the dose-dependent nature of the effects of 5-HT (compare Fig. 2E and 2F). This was further confirmed by comparing the percentage reduction of peak outward current in cells treated with low (10–50  $\mu$ mol<sup>-1</sup>) or high (100–500  $\mu$ mol<sup>-1</sup>) concentrations of 5-HT (Fig. 3A). 5-HT also increased

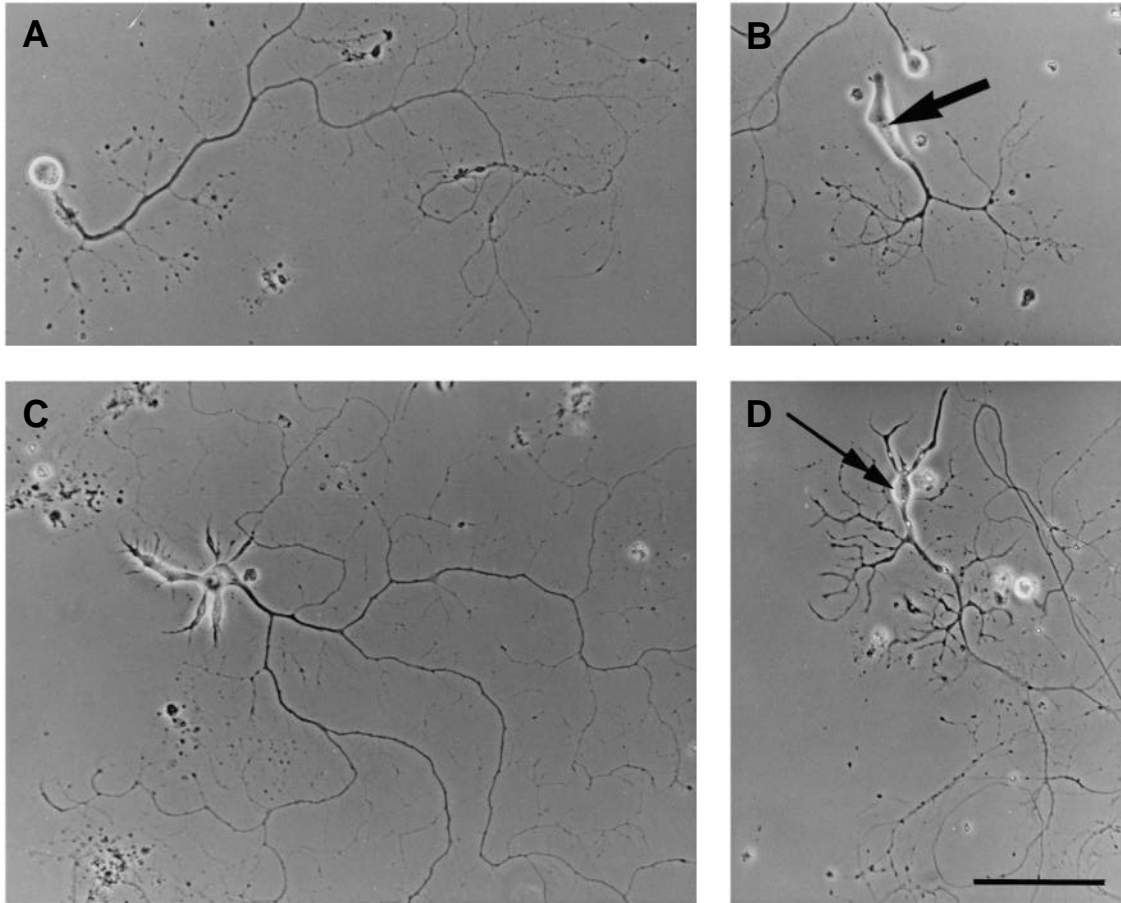

Fig. 1. *In vitro* morphology of four subtypes of *Manduca sexta* antennal lobe neurones, the whole-cell current profiles of which are modulated by 5-HT. (A) Proximal-branching cell, (B) symmetrical cell (arrow), (C) RR cell and (D) radial cell (double-headed arrow). These types of cells have been described elsewhere (Oland and Hayashi, 1993). In this paper, 5-HT-modulation of ionic currents is examined in detail in the subtype of AL neurones known as RR cells. Scale bar, 100  $\mu\text{m}$ .

significantly the time taken to reach peak current levels (Fig. 3B). In 36% of the cells, 5-HT altered the holding current at  $-70\text{ mV}$ , indicating that 5-HT might cause a slight depolarization of the membrane of some AL neurones. The effects of 5-HT on non-voltage-gated channels have not been examined further in this study. To examine the effects of 5-HT on voltage-activated currents, components of the whole cell current were isolated using routine pharmacological techniques.

#### *Isolation of potassium currents*

Subtraction currents (Fig. 2E,F) suggest that 5-HT affects a fast transient component, as well as a more slowly activating component, of the whole-cell current profile. To examine this further,  $\text{K}^+$  currents in *M. sexta* neurones were revealed by blocking  $\text{Ca}^{2+}$  currents with  $500\ \mu\text{mol l}^{-1}$   $\text{CdCl}_2$  and  $\text{Na}^+$  currents with  $10^{-8}\ \text{mol l}^{-1}$  TTX (Hayashi *et al.* 1992; Hayashi and Levine, 1992). Although functional  $\text{Na}^+$  channels do not appear to be expressed in RR cells taken from animals at stage 5 in adult development,  $\text{Na}^+$  currents have been observed in cells of this type taken from stage 9 pupae (Mercer *et al.* 1992).

The  $\text{K}^+$  channel blockers 4-aminopyridine (4-AP,  $5\ \text{mmol l}^{-1}$ ) and tetraethylammonium ( $\text{TEA}^+$ ,  $30\ \text{mmol l}^{-1}$ ) were used to isolate individual components of the macroscopic  $\text{K}^+$  current in these cells. The actions of  $\text{TEA}^+$  reduced the amplitude but not the general character of the outward current (Fig. 4A). However, 4-AP was more selective than  $\text{TEA}^+$  and segregated fast and slow components of the outward current (Fig. 4B). Moreover, the effects of 4-AP were reversed more readily than those of  $\text{TEA}^+$  with washing (Fig. 4B). At a concentration of  $5\ \text{mmol l}^{-1}$ , 4-AP blocked the fast, transient (A-type)  $\text{K}^+$  current, leaving the slower-activating component largely intact (Fig. 5). Higher concentrations of 4-AP ( $10\ \text{mmol l}^{-1}$ ) were less selective, causing some decrease in the sustained component as well as blocking the fast, transient component of the macroscopic  $\text{K}^+$  current in these cells (not shown).

The differential effect of 4-AP on fast and slow components of the outward current is apparent from whole-cell current profiles measured before (Fig. 5A) and after (Fig. 5B) the application of 4-AP. The magnitude of the early, transient current is reduced significantly, whereas the slower component remains largely intact. To reveal the time course and

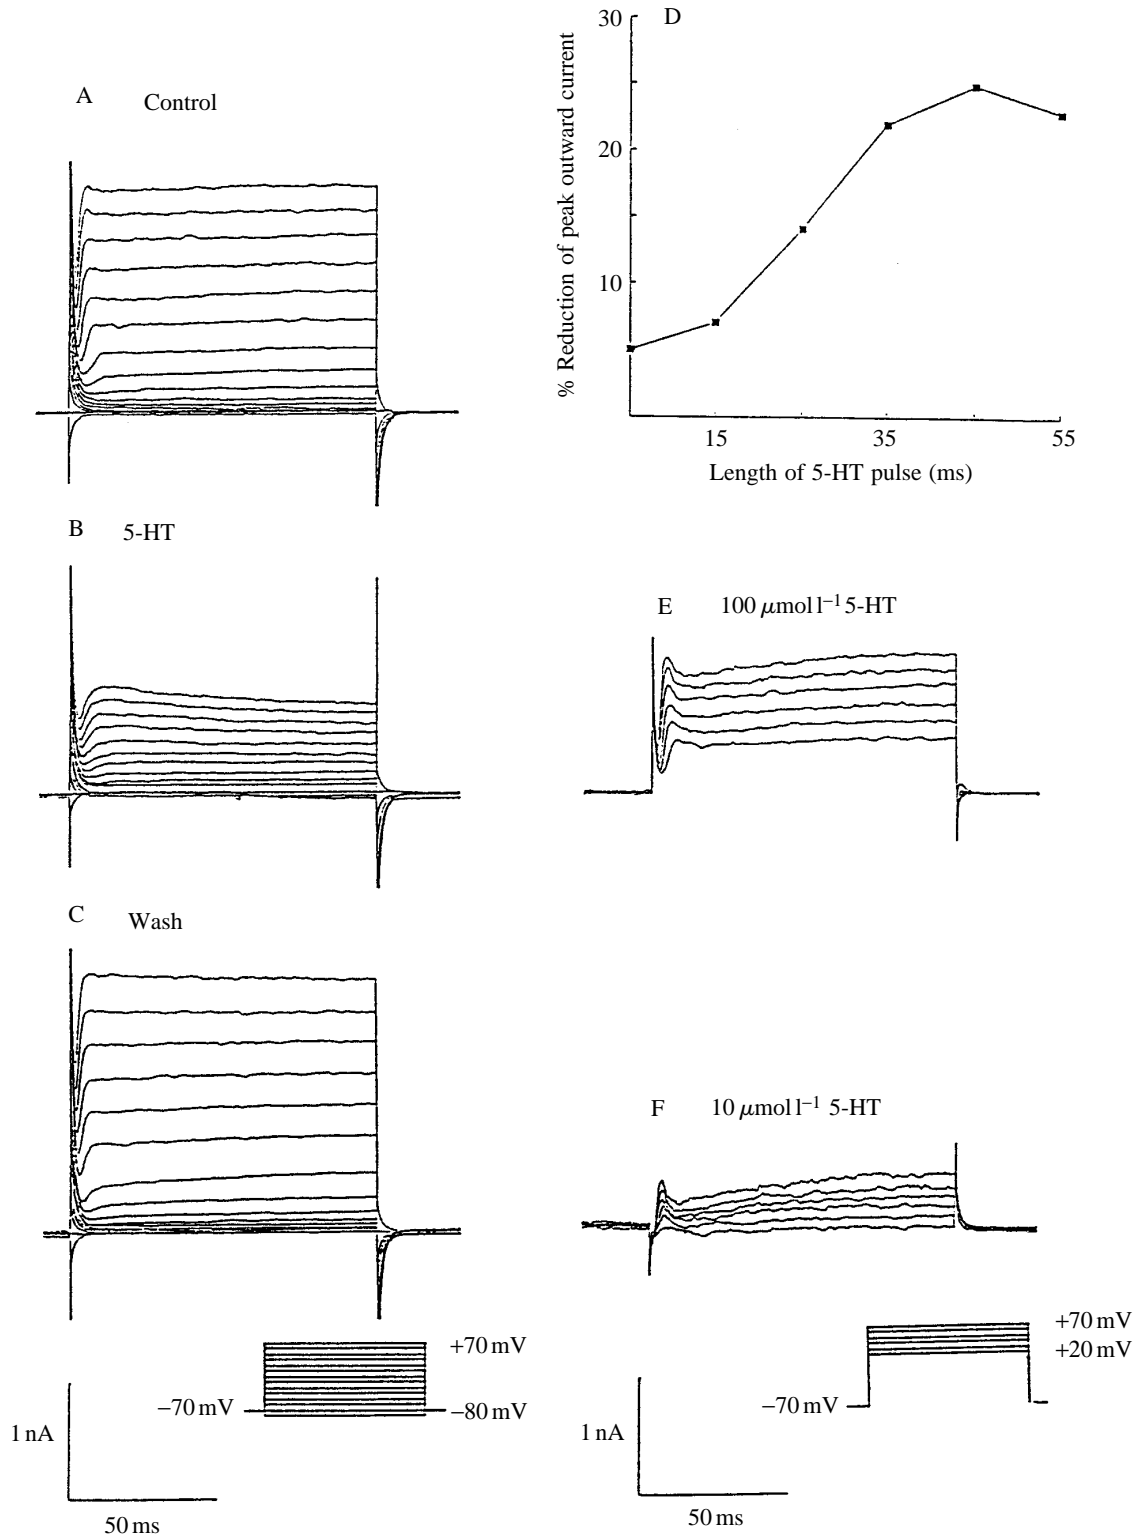

Fig. 2. Whole-cell currents and their reduction by 5-HT. (A) Whole-cell current profiles measured in RR cells from *Manduca sexta* at stage 5 of pupal development. (B) Reduction of whole-cell current by 100 ms pulses of 5-HT ( $100 \mu\text{mol l}^{-1}$ ). (C) Recovery of the magnitude of outward current after wash-out of 5-HT. (D) Change in the percentage reduction of peak outward current resulting from a stepwise increase in the duration of a  $10 \mu\text{mol l}^{-1}$  pulse of 5-HT from 5 to 55 ms. Increasing pulse duration further had no additional effect on the magnitude of the macroscopic current profile. (E) Difference currents obtained by subtracting current profiles obtained in the presence of 5-HT from those obtained prior to 5-HT application show the magnitude and time course of current blocked by  $100 \mu\text{mol l}^{-1}$  5-HT. (F) Difference currents to show current blocked by  $10 \mu\text{mol l}^{-1}$  5-HT in the same cell as in E. Comparison of E and F illustrates the dose-dependence of the effects of 5-HT.

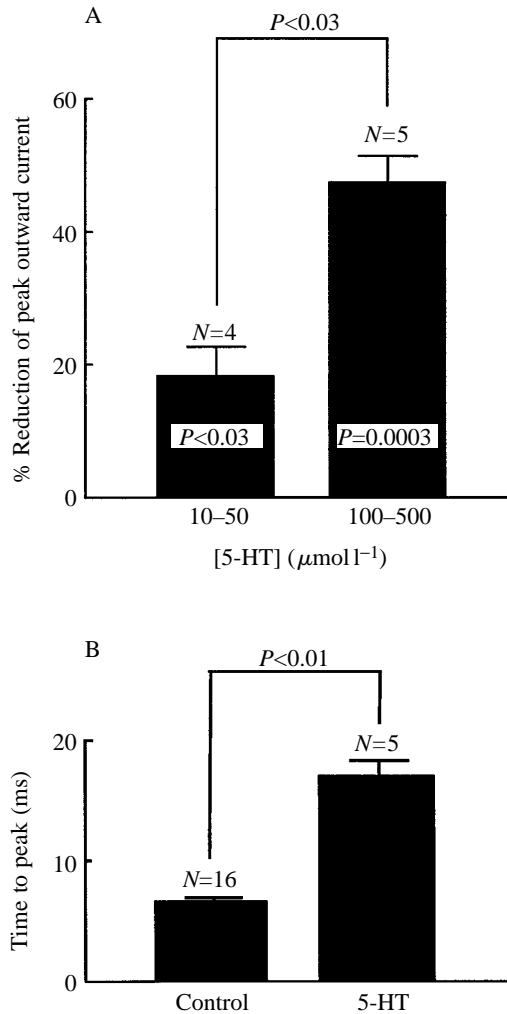

Fig. 3. (A) Percentage reduction of peak outward current by 5-HT. 5-HT caused a significant reduction of peak outward current, at concentrations of 10–50  $\mu\text{mol l}^{-1}$  ( $P < 0.03$  using two-tailed *t*-test) and 100–500  $\mu\text{mol l}^{-1}$  ( $P < 0.0003$  using two-tailed *t*-test). A between-group analysis reveals that the effects of 5-HT at concentrations of 100–500  $\mu\text{mol l}^{-1}$  are significantly greater than the effects of 10–50  $\mu\text{mol l}^{-1}$  5-HT ( $P < 0.03$  using one-tailed *t*-test). (B) Comparison of time to reach peak current levels following single voltage steps from  $-70$  to  $+50$  mV in the presence and absence of 5-HT (100–500  $\mu\text{mol l}^{-1}$ ). A between-group analysis indicates that the time taken to reach peak current levels is significantly greater in the presence of 5-HT ( $P < 0.01$  using two-tailed *t*-test). Values are means  $\pm$  S.E.M.

magnitude of the 4-AP-sensitive  $\text{K}^+$  current, current profiles recorded in the presence of 4-AP (Fig. 5B) were subtracted electronically from those elicited in the same cells prior to 4-AP application (Fig. 5A). The resulting difference currents are shown in Fig. 5C. An *I*-*V* plot of current maxima from these 4-AP-sensitive currents shows the activation threshold for the fast, transient, A-type component ( $I_A$ ) to be around  $-30$  mV (Fig. 6A,C). Activation of the slower component ( $I_{KV}$ ), from measurements of peak current recorded in the presence of 4-AP (Fig. 5B), occurs at a more depolarized potential, around

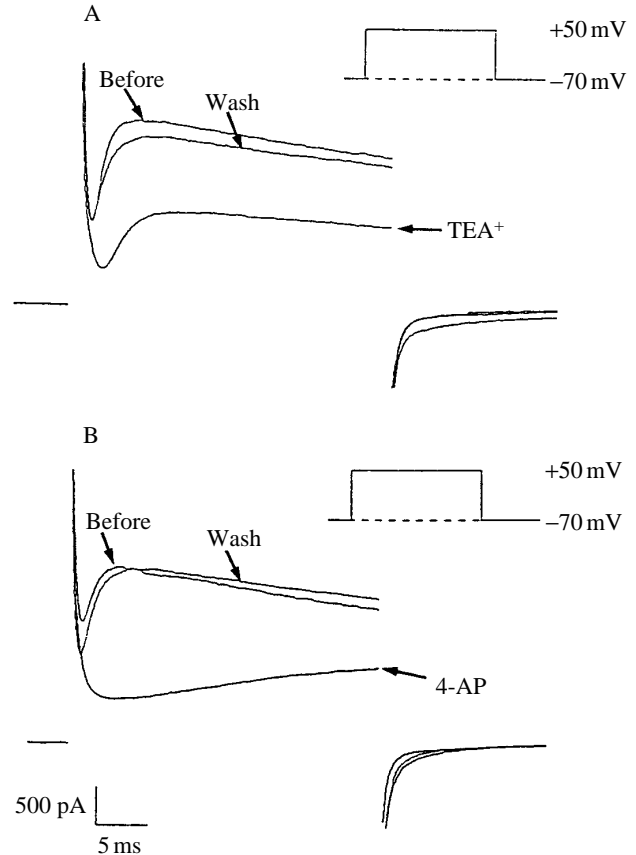

Fig. 4. Single depolarizing voltage steps from  $-70$  to  $+50$  mV show the effects of tetraethylammonium ( $\text{TEA}^+$ , 30 mmol l<sup>-1</sup>) and 4-aminopyridine (4-AP, 5 mmol l<sup>-1</sup>) on macroscopic  $\text{K}^+$  currents recorded in the presence of TTX (0.01  $\mu\text{mol l}^{-1}$ ) and  $\text{CdCl}_2$  (500  $\mu\text{mol l}^{-1}$ ). (A)  $\text{TEA}^+$  reduced the magnitude of both a fast, transient component and a slower-activating component of the  $\text{K}^+$  current. (B) The effects of 4-AP are more selective. The magnitude of a fast, transient component was reduced significantly, revealing the slower activation rate of the sustained component.

$-10$  mV (Fig. 6B,C). The two currents could also be dissociated by steady-state voltage inactivation. The fast, transient outward current, but not the slowly activating outward current, could be abolished by setting the holding potential to  $-40$  mV (Fig. 7A,B). Upon resumption of the normal holding potential of  $-70$  mV, the transient current returned (Fig. 7C). Thus, the behaviour of the transient outward current is reminiscent of that of an A-type current.

4-AP difference currents (Fig. 5C) were used to examine the kinetics of the A-type current. The properties of the slower-activating current were examined using current profiles recorded in the presence of 4-AP (Fig. 5B). The time-to-peak of both types of  $\text{K}^+$  current is voltage-dependent, decreasing as the size of the depolarizing voltage step increases (Fig. 8A,B). With a step from  $-70$  to  $+50$  mV, the fast-activating current reaches its peak level in approximately 5 ms (Fig. 8A,C), compared with a time-to-peak of 50 ms for the slower current (Fig. 8B,C). Unlike the delayed current, the A-type current inactivates during the voltage step (see Fig. 5C).

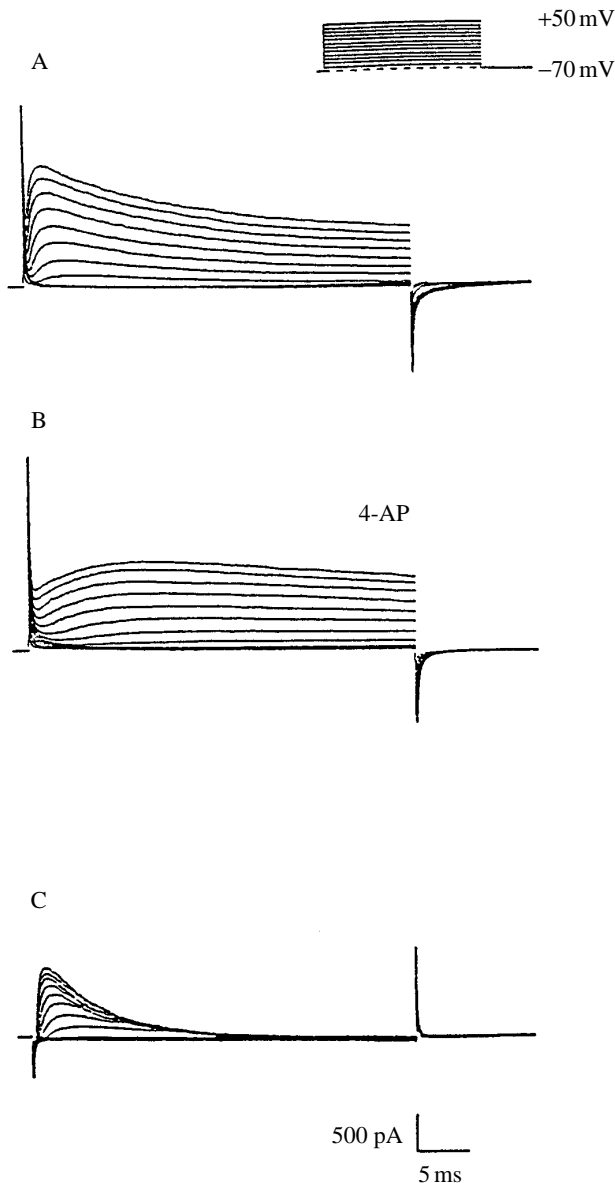

Fig. 5. Selective blockade of A-type  $K^+$  current by  $5 \text{ mmol l}^{-1}$  4-AP. Depolarizing voltage steps of 150 ms duration were used to examine the magnitude and time course of  $K^+$  current blocked by 4-AP. (A) Whole-cell current profiles measured before exposure to 4-AP. (B) Blockade of a fast, transient component reveals a slower-activating  $K^+$  current. (C) Difference currents show the current blocked by 4-AP. 4-AP is an effective blocker of A-type current in these cells, leaving a slower-activating  $K^+$  current largely intact. Outward currents were recorded in the presence of TTX ( $0.01 \mu\text{mol l}^{-1}$ ) and  $\text{CdCl}_2$  ( $500 \mu\text{mol l}^{-1}$ ).

For voltage steps between +20 and +50 mV, the time constant for inactivation of this current is relatively constant (Fig. 8D).

#### Effects of 5-HT on $K^+$ currents

5-HT-modulation of a fast, transient component of the macroscopic  $K^+$  current is clearly apparent from 5-HT difference currents shown in Fig. 2. 5-HT reduced the

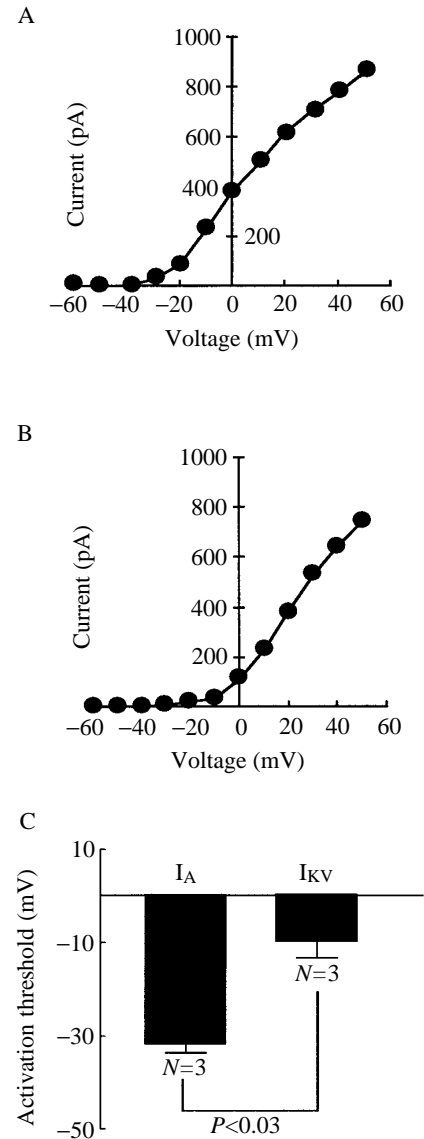

Fig. 6. Comparison of current–voltage ( $I$ – $V$ ) relationships for fast and slow components of the macroscopic  $K^+$  current recorded in the presence of TTX ( $0.01 \mu\text{mol l}^{-1}$ ) and  $\text{CdCl}_2$  ( $500 \mu\text{mol l}^{-1}$ ). (A)  $I$ – $V$  plot of 4-AP difference currents shown in Fig. 4C. (B)  $I$ – $V$  plot of  $K^+$  currents remaining after blockade of fast, transient current by 4-AP (see Fig. 4B). (C) A between-group analysis indicates that the threshold for activation of the delayed current is significantly more depolarized than that of the A-type  $K^+$  current in these cells ( $P < 0.03$  using one-tailed  $t$ -test). Values are means + s.e.m.

magnitude of this current. The 5-HT difference currents indicate that a slower-activating component was also modulated by 5-HT. This was confirmed by blocking the fast, transient current with 4-AP and examining the effects of 5-HT on the slower-activating current in isolation (Fig. 9); 5-HT reduced the magnitude of this current (Fig. 9C,D) and failed to cause a significant increase in the time-to-peak (Fig. 8C). The effect of 5-HT on the transient current was determined by subtracting the current in the presence of 5-HT from the current in the absence of 5-HT, measured with (e.g.

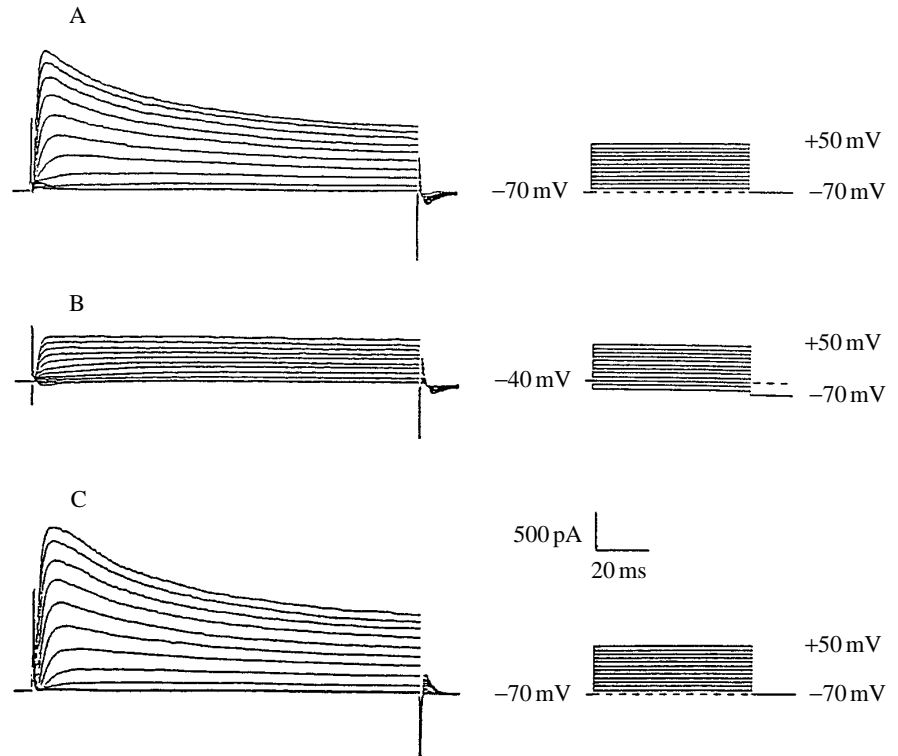

Fig. 7. Voltage inactivation of A-type  $K^+$  current. (A) Outward current elicited by a series of depolarizing voltage steps from a holding potential of  $-70$  mV. (B) Inactivation of the fast, transient (A-type) current using a holding potential of  $-40$  mV. (C) Return of A-type  $K^+$  current upon resumption of the normal holding potential of  $-70$  mV.

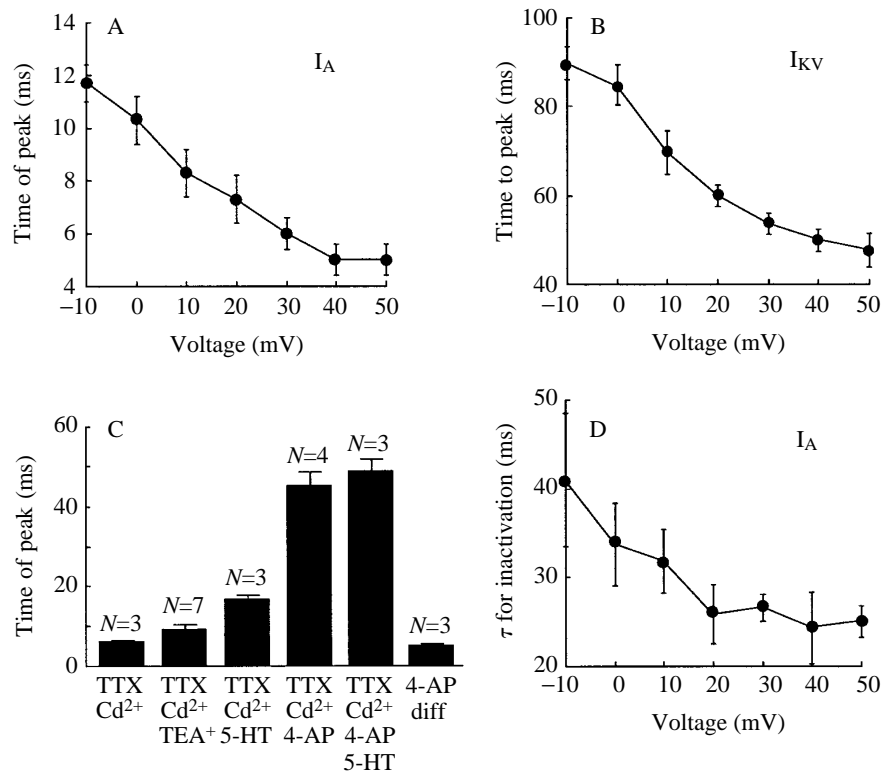

Fig. 8. Comparison of fast and slow  $K^+$  currents. (A) Time to peak of the fast, transient (A-type) current calculated from 4-AP difference currents such as those shown in Fig. 5C ( $N=3$ ). (B) Time to peak of delayed currents ( $N=3$ ) recorded in the presence of 4-AP (e.g. Fig. 5B). (C) Comparison of the effects of blocking agents used in this study on the time to reach peak current levels with single steps from  $-70$  to  $+50$  mV. 4-AP diff, measurements from 4-AP difference currents (e.g. Fig. 5C). (D) Time constants ( $\tau$ ) for inactivation of the fast, transient current measured from 4-AP difference currents such as those shown in Fig. 5C ( $N=3$ ). Error bars represent  $\pm$  S.E.M.

Fig. 9D) and without (e.g. Fig. 9B) 4-AP. The effect of 5-HT on the fast, transient current did not differ significantly from the effect of this amine on the slower-activating current (Fig. 10). The effects of 5-HT on both types of  $K^+$  currents were reversible.

#### Isolation of calcium currents

To isolate voltage-activated  $Ca^{2+}$  currents in the cells,  $K^+$  currents were blocked by replacing  $K^+$  with  $Cs^+$  in the patch pipette and adding TEA<sup>+</sup> ( $30$  mmol l<sup>-1</sup>) to the solution bathing the cells (see Materials and methods). Blockade of outward



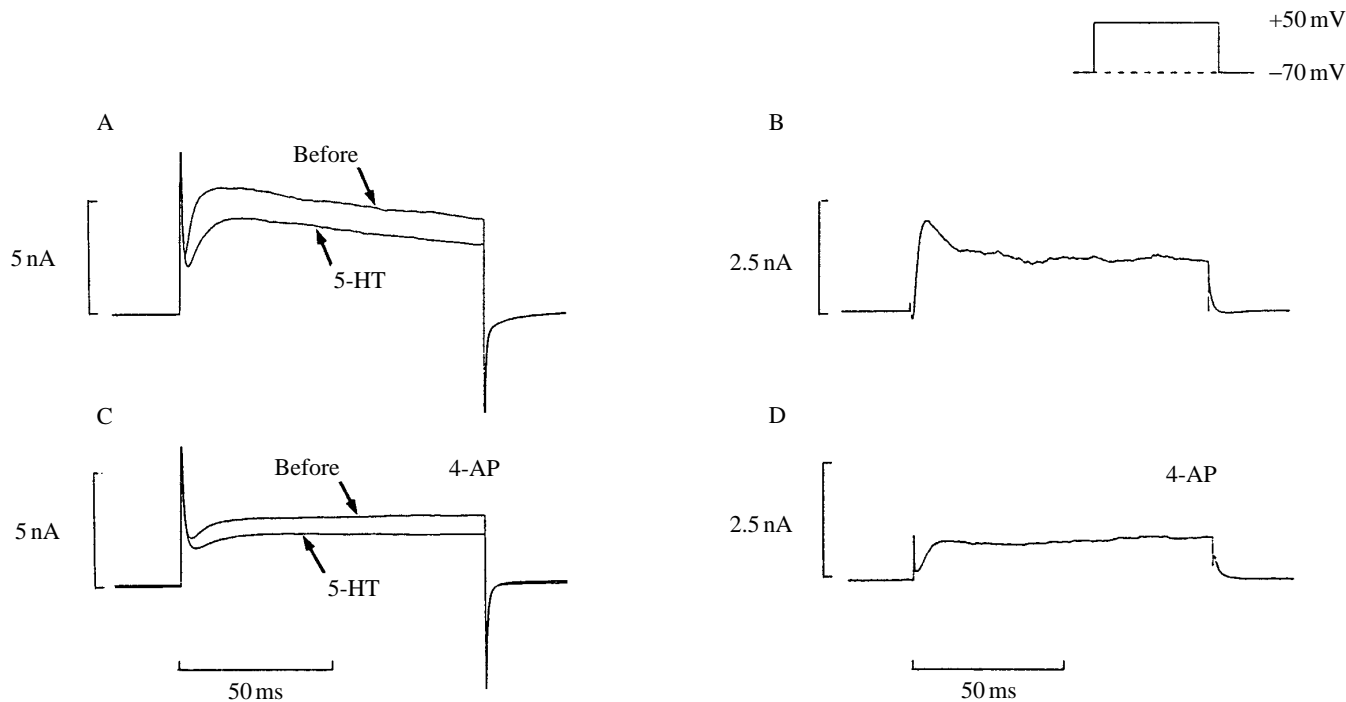

Fig. 9. 5-HT-modulation of  $K^+$  currents. (A) Single steps from  $-70$  to  $+50$  mV show the effects of 5-HT ( $50 \mu\text{mol l}^{-1}$ ) on  $K^+$  currents prior to blockade of the fast component with 4-AP ( $5 \text{ mmol l}^{-1}$ ). (B) Subtraction of current recorded in the presence of 5-HT from that measured before 5-HT application (see A) provides an indication of the current blocked by 5-HT. 5-HT modulation of the A-type current is clearly apparent. (C) Blockade of the A-type current with 4-AP to show 5-HT modulation of the delayed  $K^+$  current in isolation. (D) Subtraction of voltage-activated current recorded in the presence of 5-HT from that obtained prior to 5-HT application when 4-AP is present (see C) shows the effects of 5-HT on the delayed  $K^+$  current in isolation. Outward currents were recorded in the presence of TTX ( $0.01 \mu\text{mol l}^{-1}$ ) and  $\text{CdCl}_2$  ( $500 \mu\text{mol l}^{-1}$ ).

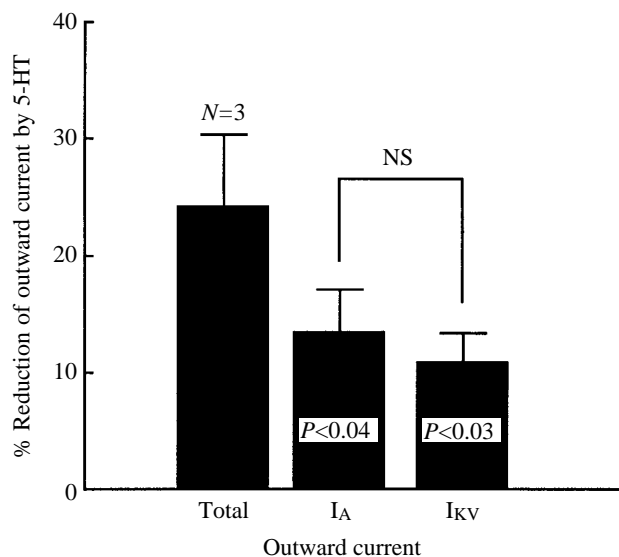

Fig. 10. Comparison of percentage reduction by 5-HT ( $50 \mu\text{mol l}^{-1}$ ) of A-type ( $I_A$ ) and delayed ( $I_{KV}$ )  $K^+$  current. 5-HT reduced significantly the A-type ( $P < 0.04$  using one-tailed  $t$ -test) and the delayed  $K^+$  current ( $P < 0.03$  using one-tailed  $t$ -test). A between-group comparison revealed no significant difference (NS) between the percentage reduction of these two  $K^+$  currents by  $50 \mu\text{mol l}^{-1}$  5-HT. Values are means + S.E.M.

currents revealed a sustained inward current activated by depolarizing voltage steps applied to the cells (Fig. 11A). The time-to-peak of the inward current was voltage-dependent (Fig. 11B), with an activation threshold of  $-37 \pm 1.8$  mV ( $N=8$ ) (Fig. 11C). Steady-state inactivation of the current was voltage-dependent (Fig. 11C). As in other *M. sexta* neurones (Hayashi *et al.* 1992; Hayashi and Levine, 1992), the magnitude of inward current could be enhanced by replacing  $\text{Ca}^{2+}$  with  $\text{Ba}^{2+}$  in the saline solution bathing the cells (not shown) or blocked with the  $\text{Ca}^{2+}$  channel blocker  $\text{CdCl}_2$  ( $500 \mu\text{mol l}^{-1}$ ). Taken together, these results suggest that the inward current observed in these cells is carried by  $\text{Ca}^{2+}$ .

#### 5-HT modulation of $\text{Ca}^{2+}$ currents

5-HT significantly reduced the magnitude of  $\text{Ca}^{2+}$  currents in cells taken from stage 5 pupae (Fig. 12A) and increased the time taken to reach maximum current levels (Fig. 12B). Comparison of data from cells treated with 50 or  $500 \mu\text{mol l}^{-1}$  5-HT suggests that the effects of 5-HT on  $\text{Ca}^{2+}$  current are dose-dependent. Blockade of  $\text{Ca}^{2+}$  current by a high concentration of 5-HT ( $500 \mu\text{mol l}^{-1}$ ) reveals a  $\text{TEA}^+$ -insensitive outward current in some cells (Fig. 13), the identity of which has yet to be determined. Preliminary evidence suggests that  $\text{Ca}^{2+}$  currents in RR neurones from animals at later stages of metamorphic adult development (stages 9–15) are less susceptible to modulation by 5-HT.

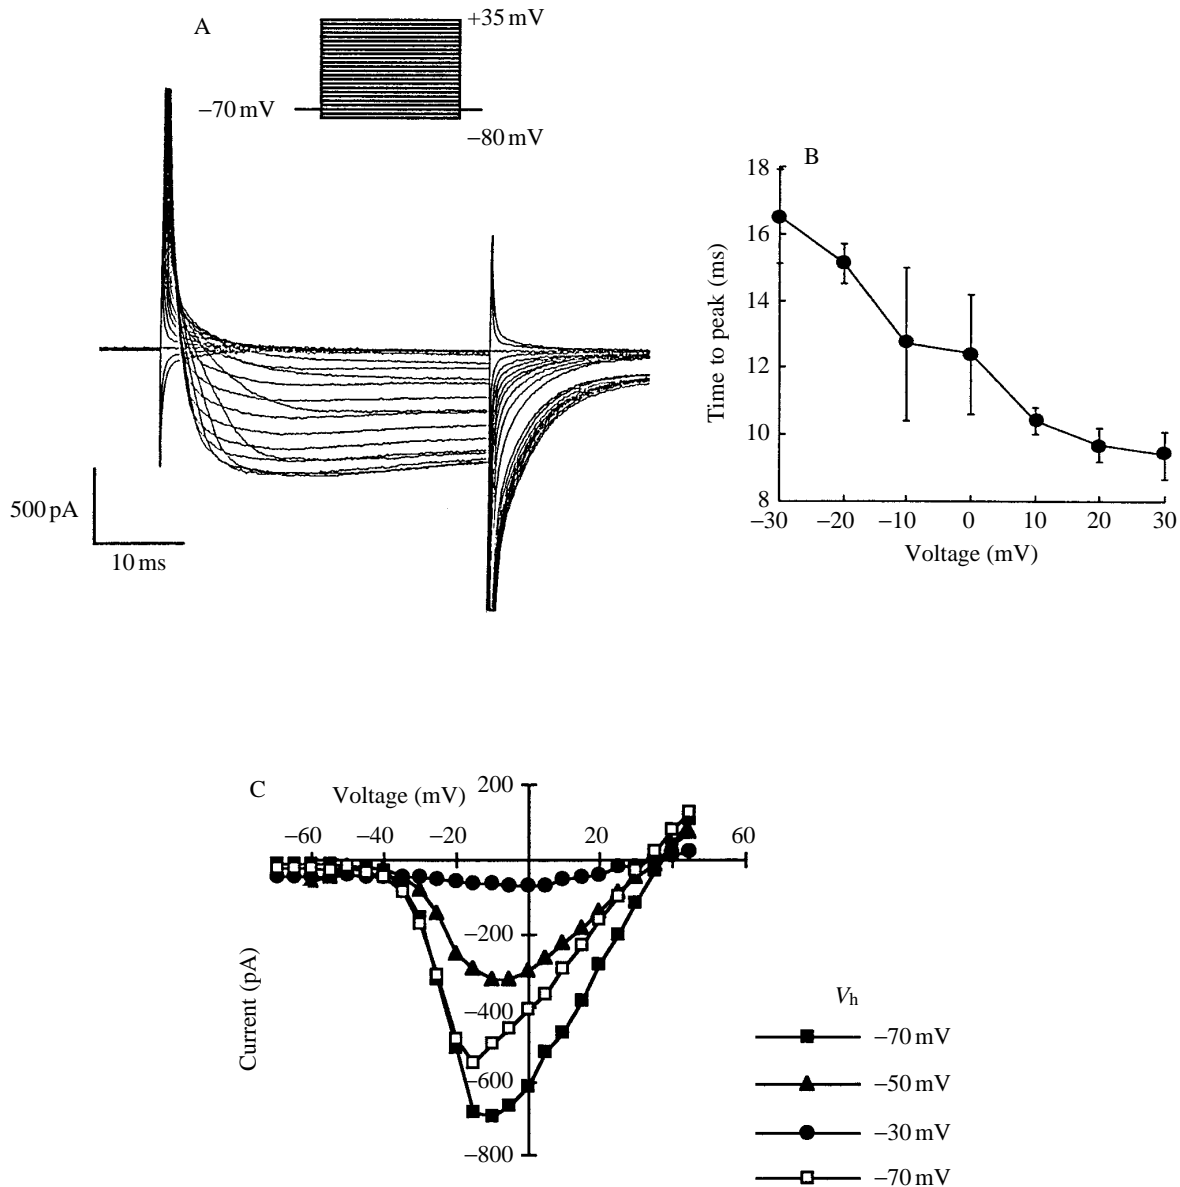

Fig. 11. Identification of  $\text{Ca}^{2+}$  currents. (A) Sustained inward current measured in the cells after blockade of outward current (see Materials and methods). (B) Time to peak current is voltage-dependent. Error bars represent  $\pm$  S.E.M.;  $N=8$ . (C) Current-voltage relationships showing peak inward current at different holding potentials. The holding potentials ( $V_h$ ) tested are indicated in the key.  $\text{Ca}^{2+}$  currents activated around  $-40$  mV. Steady-state inactivation is voltage-dependent.

### Discussion

We have presented evidence that pulse application of 5-HT inhibits outward A-type and delayed-rectifier-type  $\text{K}^+$  currents, as well as voltage-activated  $\text{Ca}^{2+}$  current, in a morphologically identifiable subtype of *M. sexta* central olfactory neurones in culture. The observed modulatory effects of 5-HT on  $\text{K}^+$  currents are consistent with the increases in excitability of mature AL neurones that result from bath application of 5-HT to the ALs of the adult moth, measured *in situ* using intracellular recording techniques (Kloppenborg and Hildebrand, 1995). Our findings suggest that reduction of outward current and the resulting loss of rectifying ability of

the cells underlie the observed increases in cell excitability induced by 5-HT. 5-HT does not appear to modulate all central olfactory neurones in this way, however. Several subtypes of AL neurones in our cultures showed no response to pulse application of 5-HT, suggesting that only certain neurones from stage 5 ALs are sensitive to short-term modulation by this amine. This also appears to be the case for neurones in the ALs of the adult moth (Kloppenborg and Hildebrand, 1995).

The rationale for studying cultured neurones derived from stage 5 pupae, as opposed to pharate adults (stage 18), is based on our intention to trace the effects of 5-HT on neurones throughout their development. It is known that 5-HT-IRNs in

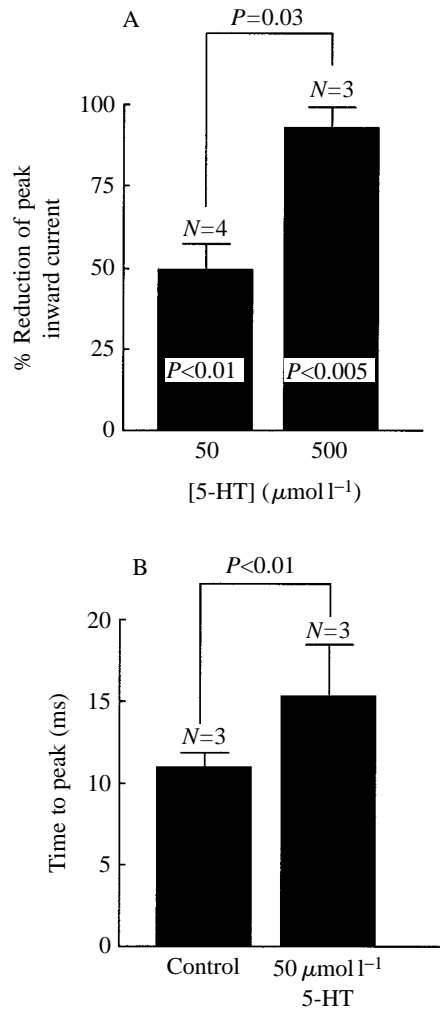

Fig. 12. (A) Percentage reduction of peak inward current by 5-HT. Inward current is reduced significantly by  $50 \mu\text{mol l}^{-1}$  5-HT ( $P < 0.01$  using two-tailed  $t$ -test) and by  $500 \mu\text{mol l}^{-1}$  5-HT ( $P < 0.005$  using two-tailed  $t$ -test). Effects of 5-HT on this current are dose-dependent. A between-group analysis reveals a significant difference between the percentage reduction caused by  $50 \mu\text{mol l}^{-1}$  and  $500 \mu\text{mol l}^{-1}$  5-HT ( $P = 0.03$  using one-tailed  $t$ -test). (B) Effect of 5-HT on time taken to reach peak current levels following single voltage steps from  $-70$  to  $-10$  mV. A between-group analysis shows that the time to reach peak current levels is significantly greater in the presence of 5-HT ( $P < 0.01$  using two-tailed  $t$ -test).

the brain of *M. sexta* are born early and persist throughout postembryonic development (Kent *et al.* 1987; Granger *et al.* 1989; Radwan *et al.* 1989) and that, despite the extensive growth and reorganization of the AL that accompanies metamorphosis (Tolbert *et al.* 1983; Hildebrand, 1985; Tolbert, 1989; Tolbert and Oland, 1989), the single 5-HT-IRN that projects to each AL remains closely associated with the AL neuropile throughout development (Kent *et al.* 1987). Although we are unable at present to assess the effects of 5-HT on neuronal development, our finding that 5-HT can modulate outward currents in some AL neurones appears to be relevant to the behaviour of AL neurones in the brain of the

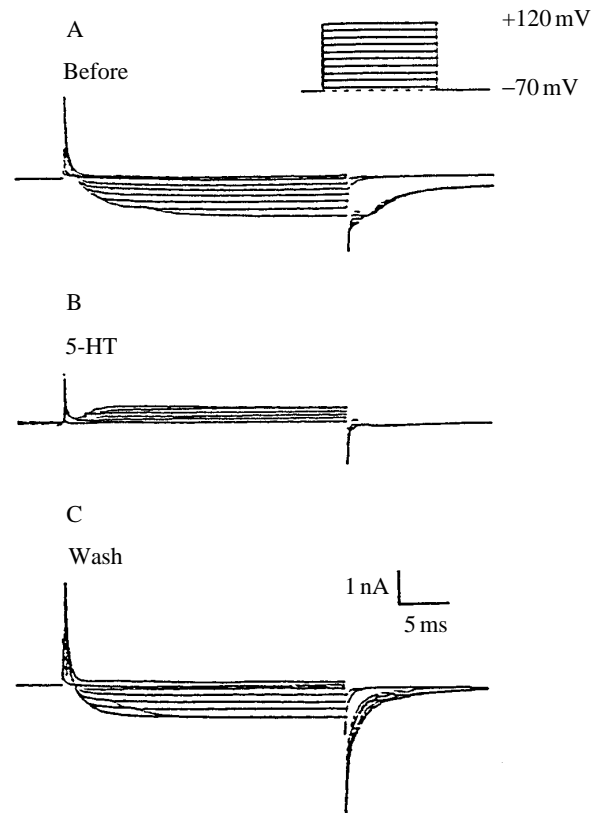

Fig. 13. Modulation of  $\text{Ca}^{2+}$  current by 5-HT. Reversible blockade of  $\text{Ca}^{2+}$  current resulting from application of 5-HT ( $500 \mu\text{mol l}^{-1}$ ).  $\text{Ca}^{2+}$  currents were measured in the presence of  $\text{TEA}^+$  ( $30 \text{ mmol l}^{-1}$ ). Blockade of inward currents reveals a  $\text{TEA}^+$ -insensitive outward current in the cells (see B).

adult moth. Work in progress addresses the effects of 5-HT on neurones derived from *M. sexta* at more advanced stages of metamorphic adult development.

In addition to its effects on outward  $\text{K}^+$  currents, pulse application of 5-HT also inhibits inward  $\text{Ca}^{2+}$  current in RR neurones from stage 5 *M. sexta* pupae. The conductance underlying this current is characterized by an activation voltage around  $-40$  mV and relatively slow inactivation. The voltage-sensitivity of the current is similar to that reported for  $\text{Ca}^{2+}$  currents identified in other insect systems (Byerly and Leung, 1988; Pearson *et al.* 1993), including leg motor neurones of *M. sexta* (Hayashi and Levine, 1992). Transient  $\text{Ca}^{2+}$  current, similar to that described by Pearson *et al.* (1993) in locust neurones, was not observed in stage 5 RR neurones. 5-HT modulation of  $\text{Ca}^{2+}$  current in *M. sexta* AL neurones may have developmental implications. A body of evidence suggests that voltage-dependent  $\text{Ca}^{2+}$  influx could regulate the differentiation of neurones in culture (Walicke and Patterson, 1981; Bixby and Spitzer, 1984; Cohan *et al.* 1987; Vidal *et al.* 1989; Holliday and Spitzer, 1990; Holliday *et al.* 1991), and there is growing evidence, in both vertebrates and invertebrates, that 5-HT can function as a developmental signal in the central nervous system (Lauder and Krebs, 1978; Haydon *et al.* 1984, 1987; McCobb *et al.* 1988a,b; Goldberg

and Kater, 1989; Lipton and Kater, 1989; Glanzman *et al.* 1990; Goldberg *et al.* 1990; Lauder, 1990). We are beginning to study the effects of chronic application of 5-HT on the morphology and growth rate of *M. sexta* AL neurones in primary cell culture.

Two major types of K<sup>+</sup> currents have been identified in cultured *M. sexta* AL neurones: a fast, transient current susceptible to blockade with 4-AP, and a slower-activating current blocked by TEA<sup>+</sup>. Fast, transient (A-type) channels that activate rapidly in response to depolarizing voltage steps and inactivate within tens or hundreds of milliseconds with maintained depolarization are expressed by most excitable cells (see Rogawski, 1985; Salkoff *et al.* 1992), with the notable exception of the squid giant axon (Hodgkin and Huxley, 1952). A-type K<sup>+</sup> channels have been observed in a number of types of insect cells (e.g. Salkoff and Wyman, 1983; Solc and Aldrich, 1988; Laurent, 1991; Saito and Wu, 1991; Hayashi *et al.* 1992; Hayashi and Levine, 1992). In neurones of *Drosophila melanogaster* these fast, transient currents have been implicated in the regulation of action potential initiation, membrane repolarization and repetitive firing of the cells (Saito and Wu, 1991), and inhibition of A-type current by 4-AP can prolong neurotransmitter release at axon terminals (Jan *et al.* 1977; Ganetsky and Wu, 1982; Saito and Wu, 1991). Mutations at the *shaker* locus that alter A-type current in *D. melanogaster* muscle cells (Salkoff and Wyman, 1981, 1983) also broaden the action potentials in cervical giant fibres of this insect (Tanouye *et al.* 1981, 1986). Delayed K<sup>+</sup> currents that activate at potentials more positive than does the A-type current and show no appreciable inactivation during a depolarizing voltage step also contribute to action potential repolarization (Saito and Wu, 1991), as do Ca<sup>2+</sup>-activated K<sup>+</sup> currents in some cells (e.g. Blatz and Magleby, 1987; Latorre *et al.* 1989). The effects of blockade of delayed K<sup>+</sup> currents in *M. sexta* AL neurones by TEA<sup>+</sup> are consistent with the pharmacology of other delayed-rectifier subtypes of K<sup>+</sup> channels (see Hille, 1992). We cannot rule out the possibility, which has yet to be investigated, that Ca<sup>2+</sup>-dependent K<sup>+</sup> currents may also be present in *M. sexta* AL neurones.

The involvement of K<sup>+</sup> channels in setting resting membrane potentials, shaping action potential waveforms and modulating the frequency of neuronal firing has been well established (see Salkoff *et al.* 1992). In sensory neurones of the marine mollusc *Aplysia californica*, 5-HT has been found to modulate the activity of several K<sup>+</sup> conductances, including a relatively voltage-independent membrane channel, the S-channel, which contributes to the resting potential of the neurones (Klein and Kandel, 1980; Klein *et al.* 1982; Pollock *et al.* 1985; Shuster *et al.* 1985; Siegelbaum *et al.* 1982), a voltage-dependent current similar to the delayed K<sup>+</sup> current I<sub>KV</sub> (Baxter and Byrne, 1989) and a steady-state Ca<sup>2+</sup>-activated K<sup>+</sup> current also present in these cells (Boyle *et al.* 1984; Ewald and Eckert, 1983; Walsh and Byrne, 1989). 5-HT-modulation of multiple K<sup>+</sup> conductances is also found in the vertebrate brain. In hippocampal slices, 5-HT activates a Ca<sup>2+</sup>-independent K<sup>+</sup> current responsible for hyperpolarization and inhibition of

CA1 neurones, it suppresses a slow Ca<sup>2+</sup>-dependent K<sup>+</sup> conductance (I<sub>AHP</sub>) in these cells that is largely responsible for accommodation of cell firing, and it causes long-lasting suppression of a voltage-dependent K<sup>+</sup> conductance (I<sub>m</sub>) that leads to neuronal depolarization and excitation (see Colino and Halliwell, 1987). 5-HT also affects hippocampal neurones in primary embryonic cell culture in a number of ways (Yakel *et al.* 1988), the most commonly observed of which is an increase in K<sup>+</sup> conductance similar to that described in slice preparations (Andrade *et al.* 1986; Colino and Halliwell, 1987). In addition to its effects on ionic conductances of cell membranes, 5-HT can also influence subcellular processes, such as Ca<sup>2+</sup>-handling (Boyle *et al.* 1984) and transmitter mobilization (Gingrich *et al.* 1988; Hochner *et al.* 1986). The results of the present investigation suggest that modulation of K<sup>+</sup> channel activity by 5-HT may be responsible for the 5-HT-induced changes in AL neurone excitability observed in the brain of the adult moth (Kloppenborg and Hildebrand, 1995). We are currently studying the effects of 5-HT on AL neurones at early and late stages of metamorphic adult development, in order to investigate the effects of 5-HT on signal modulation and on mechanisms of neuronal development.

We thank Maria de Menezes Ferreira and Carole Turner for assistance with cell culture, Charles Hedgcock, R.B.P., and Ken Miller for help with photography, and Drs Peter Kloppenborg and Richard B. Levine for critical reading of the manuscript. This study was supported by a Harkness Fellowship to A.R.M. from the Commonwealth Fund of New York, a grant from the USA/NZ Cooperative Science Program and NIH grants AI-23253 and NS-28495 to J.G.H.

### References

- ANDRADE, R., MALENKA, R. C. AND NICOLL, R. A. (1986). A G protein couples serotonin and GABA<sub>B</sub> receptors to the same channels in hippocampus. *Science* **234**, 1261–1265.
- ARMSTRONG, C. M. AND BEZANILLA, F. (1973). Currents related to movement of the gating particles of the sodium channels. *Science* **242**, 459–461.
- BAXTER, D. A. AND BYRNE, J. H. (1989). Serotonergic modulation of two potassium currents in the pleural sensory neurons of *Aplysia*. *J. Neurophysiol.* **62**, 665–679.
- BELL, R. A. AND JOACHIM, F. A. (1976). Techniques for rearing laboratory colonies of tobacco hornworms and pink bollworms. *Ann. ent. Soc. Am.* **69**, 365–373.
- BIXBY, J. L. AND SPITZER, N. C. (1984). Early differentiation of vertebrate spinal neurons in the absence of voltage-dependent Ca<sup>++</sup> and Na<sup>+</sup> influx. *Devl Biol.* **106**, 89–96.
- BLATZ, A. L. AND MAGLEBY, K. L. (1987). Calcium activated potassium channels. *Trends Neurosci.* **10**, 463–467.
- BOYLE, M. B., KLEIN, M., SMITH, S. J. AND KANDEL, E. R. (1984). Serotonin increases intracellular Ca<sup>2+</sup> transients in voltage-clamped sensory neurons in *Aplysia californica*. *Proc. natn. Acad. Sci. U.S.A.* **81**, 7642–7646.
- BYERLY, L. AND LEUNG, H.-T. (1988). Ionic currents of *Drosophila* neurons in embryonic cultures. *J. Neurosci.* **8**, 4379–4393.
- CHRISTENSEN, T. A. AND HILDEBRAND, J. G. (1987a). Male-specific,

- sex pheromone-selective projection neurons in the antennal lobes of the moth *Manduca sexta*. *J. comp. Physiol. A* **160**, 553–569.
- CHRISTENSEN, T. A. AND HILDEBRAND, J. G. (1987*b*). Functions, organization and physiology of the olfactory pathways in the lepidopteran brain. In *Arthropod Brain: Its Evolution, Development, Structure and Functions* (ed. A. P. Gupta), pp. 457–484. New York: Wiley.
- COHAN, C. S., CONNOR, J. A. AND KATER, S. B. (1987). Electrically and chemically mediated increases in intracellular calcium in neuronal growth cones. *J. Neurosci.* **7**, 3588–3599.
- COLINO, A. AND HALLIWELL, J. V. (1987). Differential modulation of three separate K-conductances in hippocampal CA1 neurons by serotonin. *Nature* **328**, 73–77.
- CONNOR, J. A. AND STEVENS, C. F. (1971). Voltage clamp studies of a transient outward membrane current in gastropod neural somata. *J. Physiol., Lond.* **213**, 21–30.
- EWALD, D. AND ECKERT, R. (1983). Cyclic AMP enhances calcium-dependent potassium current in *Aplysia* neurons. *Cell. molec. Neurobiol.* **3**, 345–353.
- FENWICK, E. M., MARTY, A. AND NEHER, E. (1982). A patch-clamp study of bovine chromaffin cells and of their sensitivity to acetylcholine. *J. Physiol., Lond.* **331**, 577–597.
- GANETSKY, B. AND WU, C-F. (1982). *Drosophila* mutants with opposing effects on nerve excitability: genetic and spatial interactions in repetitive firing. *J. Neurophysiol.* **47**, 501–514.
- GINGRICH, K. J., BAXTER, D. A. AND BYRNE, J. H. (1988). Mathematical model of cellular mechanisms contributing to presynaptic facilitation. *Brain Res. Bull.* **21**, 411–419.
- GLANZMAN, D. L., KANDEL, E. R. AND SCHACHER, S. (1990). Target-dependent structural changes accompanying long-term synaptic facilitation in *Aplysia* neurons. *Science* **249**, 799–802.
- GOLDBERG, J. I. AND KATER, S. B. (1989). Expression and function of the neurotransmitter serotonin during development of the *Helisoma* nervous system. *Dev. Biol.* **131**, 483–495.
- GOLDBERG, J. I., MILLS, L. R. AND KATER, S. B. (1990). Novel effects of serotonin on neurite outgrowth in neurons cultured from embryos of *Helisoma trivolvis*. *J. Neurobiol.* **22**, 182–194.
- GRANGER, N. A., HOMBERG, U., HENDERSON, P., TOWLE, A. AND LAUDER, J. M. (1989). Serotonin-immunoreactive neurons in the brain of *Manduca sexta* during larval development and larval-pupal metamorphosis. *Int. J. dev. Neurosci.* **7**, 55–72.
- HALÁSZ, N. AND SHEPHERD, G. M. (1983). Neurochemistry of the vertebrate olfactory bulb. *Neurosci.* **10**, 579–619.
- HAMILL, O. P., MARTY, A., NEHER, E., SAKMANN, B. AND SIGWORTH, R. F. (1981). Improved patch-clamp techniques for high resolution current recording from cell-free membrane patches. *Pflügers Arch.* **391**, 85–100.
- HANSSON, B. S., CHRISTENSEN, T. A. AND HILDEBRAND, J. G. (1991). Functionally distinct subdivisions of the macroglomerular complex in the antennal lobe of the male sphinx moth *Manduca sexta*. *J. comp. Neurol.* **312**, 264–278.
- HAYASHI, J. H. AND HILDEBRAND, J. G. (1990). Insect central olfactory neurons in primary culture. *J. Neurosci.* **10**, 848–859.
- HAYASHI, J. H. AND LEVINE, R. B. (1992). Calcium and potassium currents in leg motoneurons during the postembryonic development of the hawkmoth *Manduca sexta*. *J. exp. Biol.* **171**, 15–42.
- HAYASHI, J. H., OLAND, L. A. AND HILDEBRAND, J. G. (1992). The development of potassium currents in cultured insect olfactory neurons. *Soc. Neurosci. Abstr.* **18**, 230.
- HAYDON, P. G., KATER, S. B. AND MCCOBB, D. P. (1987). The regulation of neurite outgrowth, growth cone motility and electrical synaptogenesis by serotonin. *J. Neurobiol.* **18**, 197–215.
- HAYDON, P. G., MCCOBB, D. P. AND KATER, S. B. (1984). Serotonin selectively inhibits growth cone motility and synaptogenesis of specific identified neurons. *Science* **226**, 561–564.
- HILDEBRAND, J. G. (1985). Metamorphosis of the insect nervous system. Influences of the periphery on the postembryonic development of the antennal sensory pathway in the brain of *Manduca sexta*. In *Model Neural Networks and Behavior* (ed. A. I. Selverston), pp. 129–148. New York: Plenum.
- HILLE, B. (1992). *Ionic Channels of Excitable Membranes*, 2nd edition. Sunderland, MA: Sinauer.
- HOCHNER, B., KLEIN, M., SCHACHER, S. AND KANDEL, E. R. (1986). Additional component in the cellular mechanism of presynaptic facilitation contributes to behavioral dishabituation in *Aplysia*. *Proc. natn. Acad. Sci. U.S.A.* **83**, 8794–8798.
- HODGKIN, A. L. AND HUXLEY, A. F. (1952). Currents carried by sodium and potassium ions through the membrane of the giant axon of *Loligo*. *J. Physiol., Lond.* **116**, 449–472.
- HOLLIDAY, J., ADAMS, R. J., SEJNOWSKI, T. J. AND SPITZER, N. C. (1991). Calcium-induced release of calcium regulates differentiation of cultured spinal neurons. *Neuron* **7**, 787–796.
- HOLLIDAY, J. AND SPITZER, N. C. (1990). Spontaneous calcium influx and its roles in differentiation of spinal neurons in culture. *Dev. Biol.* **141**, 13–23.
- HOMBERG, U., CHRISTENSEN, T. A. AND HILDEBRAND, J. G. (1989). Structure and function of the deutocerebrum in insects. *A. Rev. Ent.* **34**, 477–501.
- HOMBERG, U. AND HILDEBRAND, J. G. (1989). Serotonin-immunoreactive neurons in the median protocerebrum and suboesophageal ganglion of the sphinx moth *Manduca sexta*. *Cell Tissue Res.* **258**, 1–24.
- HOMBERG, U., MONTAGUE, R. A. AND HILDEBRAND, J. G. (1988). Anatomy of antenno-cerebral pathways in the brain of the sphinx moth *Manduca sexta*. *Cell Tissue Res.* **254**, 255–281.
- HOSKINS, S. G., HOMBERG, U., KINGAN, T., CHRISTENSEN, T. A. AND HILDEBRAND, J. G. (1986). Immunocytochemistry of GABA in the antennal lobes of the sphinx moth, *Manduca sexta*. *Cell Tissue Res.* **244**, 243–252.
- JAN, Y. N., JAN, L. Y. AND DENNIS, M. J. (1977). Two mutations of synaptic transmission in *Drosophila*. *Proc. R. Soc. Lond. B* **198**, 87–108.
- KANZAKI, R., ARBAS, E. A. AND HILDEBRAND, J. G. (1991*a*). Physiology and morphology of protocerebral olfactory neurons in the male moth, *Manduca sexta*. *J. comp. Physiol. A* **168**, 281–298.
- KANZAKI, R., ARBAS, E. A. AND HILDEBRAND, J. G. (1991*b*). Physiology and morphology of descending neurons in pheromone-processing olfactory pathways in the male moth *Manduca sexta*. *J. comp. Physiol. A* **169**, 1–14.
- KANZAKI, R., ARBAS, E. A., STRAUSFELD, N. J. AND HILDEBRAND, J. G. (1989). Physiology and morphology of projection neurons in the antennal lobe of the male moth *Manduca sexta*. *J. comp. Physiol. A* **165**, 427–453.
- KENT, K. S., HOSKINS, S. G. AND HILDEBRAND, J. G. (1987). A novel serotonin-immunoreactive neuron in the antennal lobe of the sphinx moth *Manduca sexta* persists throughout postembryonic life. *J. Neurobiol.* **18**, 451–465.
- KLEIN, M., CAMARDO, J. AND KANDEL, E. R. (1982). Serotonin modulates a specific potassium current in the sensory neurons that show presynaptic facilitation in *Aplysia*. *Proc. natn. Acad. Sci. U.S.A.* **79**, 5713–5717.

- KLEIN, M. AND KANDEL, E. R. (1980). Mechanism of calcium current modulation underlying presynaptic facilitation and behavioral sensitization in *Aplysia*. *Proc. natn. Acad. Sci. U.S.A.* **77**, 6912–6916.
- KLOPPENBURG, P. AND HILDEBRAND, J. G. (1992). Modulatory effects of 5-hydroxytryptamine on interneurons in the antennal lobe of the sphinx moth, *Manduca sexta*. *Soc. Neurosci. Abstr.* **18**, 303.
- KLOPPENBURG, P. AND HILDEBRAND, J. G. (1995). 5-Hydroxytryptamine modulates the responses of interneurons in the antennal lobe of the sphinx moth *Manduca sexta*. *J. exp. Biol.* **198**, 603–611.
- LATORRE, R., OBERHAUSER, A., LABARCA, P. AND ALVAREZ, O. (1989). Varieties of calcium-activated potassium channels. *A. Rev. Physiol.* **51**, 385–399.
- LAUDER, J. M. (1990). Ontogeny of the serotonergic system in the rat: serotonin as a development signal. *Ann. N.Y. Acad. Sci.* **600**, 297–314.
- LAUDER, J. M. AND KREBS, H. (1978). Serotonin as a differentiation signal in early neurogenesis. *Devl Neurosci.* **1**, 15–30.
- LAURENT, G. (1991). Evidence for voltage-activated outward currents in the neuropilar membrane of locust nonspiking local interneurons. *J. Neurosci.* **11**, 1713–1726.
- LIPTON, S. A. AND KATER, S. B. (1989). Neurotransmitter regulation of neuronal outgrowth, plasticity and survival. *Trends Neurosci.* **12**, 265–270.
- MATSUMOTO, S. G. AND HILDEBRAND, J. G. (1981). Olfactory mechanisms in the moth *Manduca sexta*: Response characteristics and morphology of central neurons in the antennal lobes. *Proc. R. Soc. Lond. B* **213**, 249–277.
- MCCOBB, D. P., COHAN, C. S., CONNOR, J. A. AND KATER, S. B. (1988a). Interactive effects of serotonin and acetylcholine on neurite elongation. *Neuron* **1**, 377–385.
- MCCOBB, D. P., HAYDON, P. G. AND KATER, S. B. (1988b). Dopamine and serotonin inhibition of neurite elongation of different identified neurons. *J. Neurosci. Res.* **19**, 19–26.
- MERCER, A. R., HAYASHI, J. H. AND HILDEBRAND, J. G. (1992). Modulatory effects of 5-hydroxytryptamine on voltage-gated currents in cultured insect olfactory neurons. *Soc. Neurosci. Abstr.* **18**, 303.
- OLAND, L. A. AND HAYASHI, J. H. (1993). Effects of the steroid hormone 20-hydroxyecdysone and prior sensory input on the survival and growth of moth central olfactory neurons *in vitro*. *J. Neurobiol.* **24**, 1170–1186.
- OLAND, L. A., HAYASHI, J. H. AND TOLBERT, L. P. (1992). Effects of the steroid hormone 20-hydroxyecdysone on the branching pattern of cultured neurons from the developing olfactory lobe of the moth. *Soc. Neurosci. Abstr.* **18**, 230.
- PEARSON, H. A., LEES, G. AND WRAY, D. (1993). Calcium channel currents in neurones from locust (*Schistocerca gregaria*) thoracic ganglia. *J. exp. Biol.* **177**, 201–221.
- POLLOCK, J. D., BERNIER, L. AND CAMARDO, J. S. (1985). Serotonin and cyclic adenosine 3',5'-monophosphate modulate the potassium current in tail sensory neurons in the pleural ganglion of *Aplysia*. *J. Neurosci.* **5**, 1862–1871.
- RADWAN, W. A., GRANGER, N. A. AND LAUDER, J. M. (1989). Development and distribution of serotonin in the central nervous system of *Manduca sexta* during embryogenesis. I. The brain and frontal ganglion. *Int. J. dev. Neurosci.* **7**, 27–41.
- ROGAWSKI, M. A. (1985). The A-current: How ubiquitous a feature of excitable cells is it? *Trends Neurosci.* **8**, 214–219.
- RUDY, B. (1988). Diversity and ubiquity of K channels. *Neurosci.* **25**, 729–749.
- SAITO, M. AND WU, C.-F. (1991). Expression of ion channels and mutational effects in giant *Drosophila* neurons differentiated from cell division-arrested embryonic neuroblasts. *J. Neurosci.* **11**, 2135–2150.
- SALECKER, I. AND DISTLER, P. (1990). Serotonin-immunoreactive neurons in the antennal lobes of the American cockroach *Periplaneta americana*: Light- and electron-microscopic observations. *Histochem.* **94**, 463–473.
- SALKOFF, L., BAKER, K., BUTLER, A., COVARRUBIAS, M., PAK, M. D. AND WEI, A. (1992). An essential 'set' of K<sup>+</sup> channels conserved in flies, mice and humans. *Trends Neurosci.* **15**, 161–166.
- SALKOFF, L. B. AND WYMAN, R. J. (1981). Genetic modification of potassium channels in *Drosophila shaker* mutants. *Nature* **293**, 228–230.
- SALKOFF, L. B. AND WYMAN, R. J. (1983). Ion currents in *Drosophila* flight muscles. *J. Physiol., Lond.* **337**, 687–709.
- SANES, J. R. AND HILDEBRAND, J. G. (1976a). Structure and development of antennae in a moth, *Manduca sexta*. *Devl Biol.* **51**, 262–299.
- SANES, J. R. AND HILDEBRAND, J. G. (1976b). Origin and morphogenesis of sensory neurons in an insect antenna. *Devl Biol.* **51**, 300–319.
- SCHNEIDERMAN, A. M., MATSUMOTO, S. G. AND HILDEBRAND, J. G. (1982). Trans-sexually grafted antennae influence development of sexually dimorphic neurones in the moth brain. *Nature* **98**, 844–846.
- SHEPHERD, G. M., PEDERSEN, P. E. AND GREER, C. A. (1987). Development of olfactory specificity in the albino rat: A model system. In *Perinatal Development: A Psychobiological Perspective* (ed. N. A. Krasnegor, E. M. Blass, M. A. Hofer and W. P. Smotherman), pp. 127–144. New York: Academic Press.
- SHUSTER, M. J., CAMARDO, J. S., SIEGELBAUM, S. A. AND KANDEL, E. R. (1985). Cyclic AMP-dependent protein kinase closes the serotonin-sensitive K<sup>+</sup> channels of *Aplysia* sensory neurons in cell-free membrane patches. *Nature* **313**, 392–395.
- SIEGELBAUM, S. A., CAMARDO, J. S. AND KANDEL, E. R. (1982). Serotonin and cyclic AMP close single K<sup>+</sup> channels in *Aplysia* sensory neurons. *Nature* **299**, 413–417.
- SOGHOMONIAN, J. J., BEAUDET, A. AND DESCARRIES, L. (1988). Ultrastructural relationships of central serotonin neurons. In *Neuronal Serotonin* (ed. N. N. Osborne and M. Hamon), pp. 57–92. Chichester: Wiley.
- SOLC, C. K. AND ALDRICH, R. W. (1988). Voltage-gated potassium channels in larval CNS neurons of *Drosophila*. *J. Neurosci.* **8**, 2556–2570.
- SUN, X. J., TOLBERT, L. P. AND HILDEBRAND, J. G. (1992). Ultrastructural characteristics of the 5-HT-immunoreactive neuron in the antennal lobe of *Manduca sexta*. *Soc. Neurosci. Abstr.* **18**, 303.
- SUN, X. J., TOLBERT, L. P. AND HILDEBRAND, J. G. (1993). Ramification pattern and ultrastructural characteristics of the serotonin immunoreactive neuron in the antennal lobe of the moth *Manduca sexta*: A laser scanning confocal and electron microscopic study. *J. comp. Neurol.* **338**, 5–16.
- TANOUE, M. A., FERRUS, A. AND FUJITA, S. C. (1981). Abnormal action potentials associated with the *shaker* complex locus of *Drosophila*. *Proc. natn. Acad. Sci. U.S.A.* **78**, 6548–6552.
- TANOUE, M. A., KAMB, C. A., IVERSON, L. E. AND SALKOFF, L. B.

- (1986). Genetics and molecular biology of ionic channels in *Drosophila*. *A. Rev. Neurosci.* **9**, 255–276.
- TOLBERT, L. P. (1989). Afferent axons from the antenna influence the number and placement of intrinsic synapses in the antennal lobes of *Manduca sexta*. *Synapse* **3**, 83–95.
- TOLBERT, L. P. AND HILDEBRAND, J. G. (1981). Organization and synaptic ultrastructure of glomeruli in the antennal lobes of the moth *Manduca sexta*: A study using thin sections and freeze fracture. *Proc. R. Soc. Lond. B* **213**, 279–301.
- TOLBERT, L. P., MATSUMOTO, S. G. AND HILDEBRAND, J. G. (1983). Development of synapses in the antennal lobes of the moth *Manduca sexta* during metamorphosis. *J. Neurosci.* **3**, 1158–1175.
- TOLBERT, L. P. AND OLAND, L. A. (1989). A role for glia in the development of organized neuropilar structures. *Trends Neurosci.* **12**, 70–75.
- VIDAL, S., RAYNAUD, B. AND WEBER, M. J. (1989). The role of Ca<sup>2+</sup> channels of the L-type in neurotransmitter plasticity of cultured sympathetic neurons. *Molec. Brain Res.* **6**, 187–196.
- WALICKE, P. A. AND PATTERSON, P. H. (1981). On the role of Ca<sup>2+</sup> in the transmitter choice made by cultured sympathetic neurons. *J. Neurosci.* **1**, 343–350.
- WALSH, J. P. AND BYRNE, J. H. (1989). Modulation of a steady-state Ca<sup>2+</sup>-activated K<sup>+</sup> current in tail sensory neurons of *Aplysia*: Role of serotonin and cyclic AMP. *J. Neurophysiol.* **61**, 32–44.
- YAKEL, J. L., TRUSSEL, L. O. AND JACKSON, M. B. (1988). Three serotonin responses in cultured mouse hippocampal and striatal neurons. *J. Neurosci.* **8**, 1273–1285.
